# Supplementary material for: A solvatochromic cyanostilbene derivative as an intensity and wavelength-based fluorescent sensor for water in organic solvents
Source: Royal Society of Chemistry journal article supplement (doi:10.1039/c7nj01361b), 2017-01-01
Supplement: c7nj01361b1.pdf [file c7nj01361b1.pdf]

## Supporting Information

### **Solvatochromic cyanostilbene derivative as intensity and wavelength-based fluorescent sensors for water in organic solvents**

*Yuping Zhang, Chunshuang Liang, and Shimei Jiang\**

State Key Laboratory of Supramolecular Structure and Materials, College of  
Chemistry, Jilin University, 2699 Qianjin Avenue, Changchun 130012, P. R. China

**Corresponding Author: E-mail:** [smjiang@jlu.edu.cn](mailto:smjiang@jlu.edu.cn). Tel: +86-431-85168474. Fax:  
+86-431-85193421.

**Table S1.** Photophysical properties of 1 in various solvents.

| Solvent <sup>a</sup> | $\Delta f$ | $\lambda_{\text{abs}}^{\text{b}}$ (nm) | $\lambda_{\text{em}}^{\text{c}}$ (nm) | $\Phi_{\text{F}}$ (%) |
|----------------------|------------|----------------------------------------|---------------------------------------|-----------------------|
| Hex                  | -0.0010    | 365                                    | 465                                   | 0                     |
| Tol                  | 0.0132     | 367                                    | 496                                   | 5.9                   |
| Dio                  | 0.0233     | 365                                    | 505                                   | 8.2                   |
| EA                   | 0.2010     | 369                                    | 544                                   | 16.5                  |
| THF                  | 0.2096     | 374                                    | 548                                   | 20.4                  |
| Chl                  | 0.1479     | 378                                    | 553                                   | 9.0                   |
| DCM                  | 0.2172     | 375                                    | 562                                   | 1.9                   |
| DMF                  | 0.2742     | 379                                    | -                                     | 0                     |
| DMSO                 | 0.2630     | 384                                    | -                                     | 0                     |

<sup>a</sup> Abbreviations: Hex, n-hexane; Tol, Toluene; Dio, Dioxane; EA, Ethyl acetate; THF, Tetrahydrofuran; Chl, Chloroform; DCM, Dichloromethane; DMF, Dimethylformamide; DMSO, Dimethyl sulfoxide; <sup>b</sup>  $\lambda_{\text{abs}}$ , absorption maximum, <sup>c</sup>  $\lambda_{\text{ex}}$ , emission maximum.

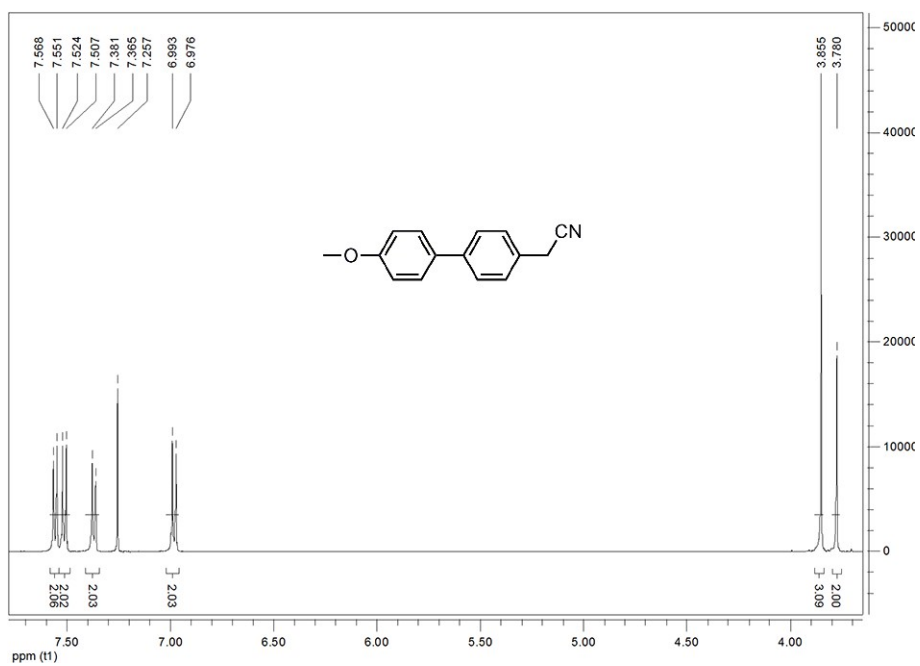

**Fig. S1**  $^1\text{H}$  NMR (500 MHz) spectrum of compound **2** in  $\text{CDCl}_3$ .

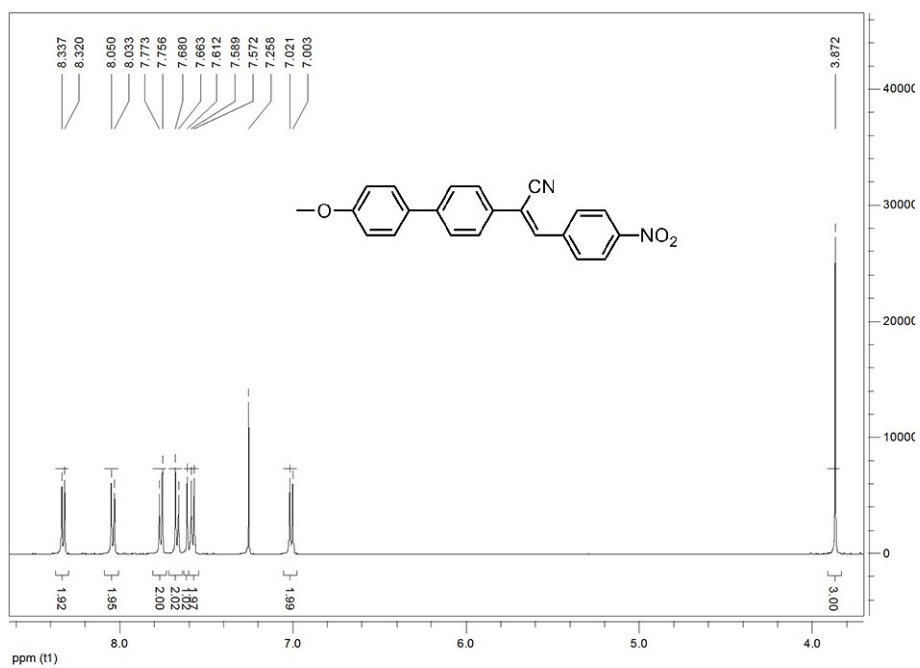

**Fig. S2**  $^1\text{H}$  NMR (500 MHz) spectrum of compound **1** in  $\text{CDCl}_3$ .

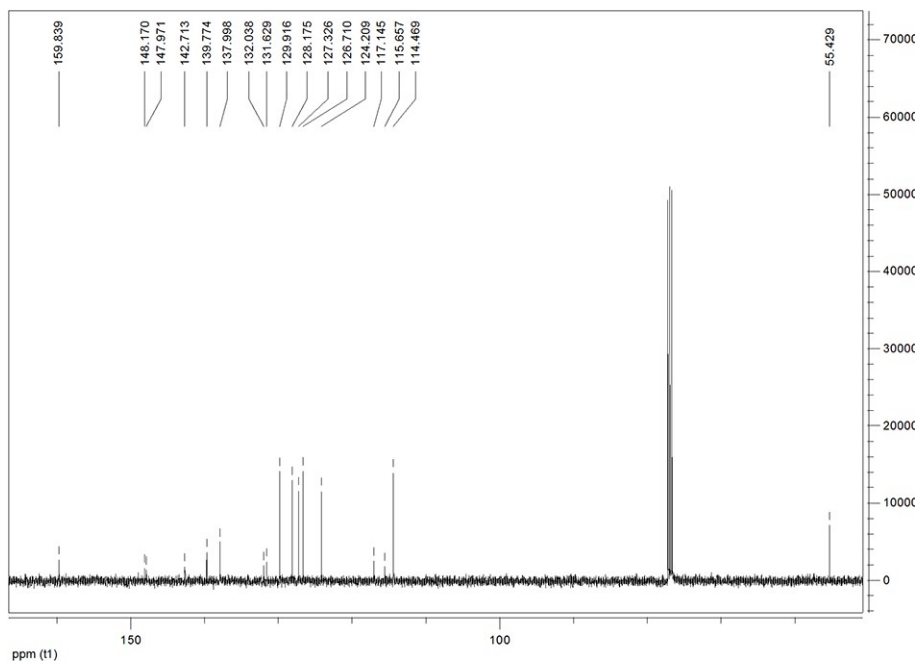

**Fig. S3**  $^{13}\text{C}$  NMR (125 MHz) spectrum of compound **1** in  $\text{CDCl}_3$ .
